# Supplementary material for: MUC16 Is Overexpressed in Idiopathic Pulmonary Fibrosis and Induces Fibrotic Responses Mediated by Transforming Growth Factor-β1 Canonical Pathway
Source: MDPI journal article supplement (doi:10.3390/ijms22126502), 2021-06-17

**Figure 1**

**MUC16 (~ 200 KDa)**

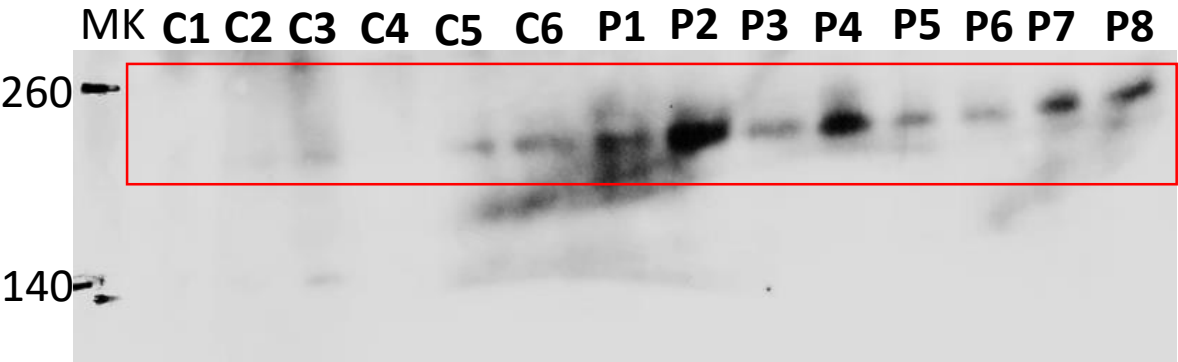

**β-actin (~ 42 KDa)**

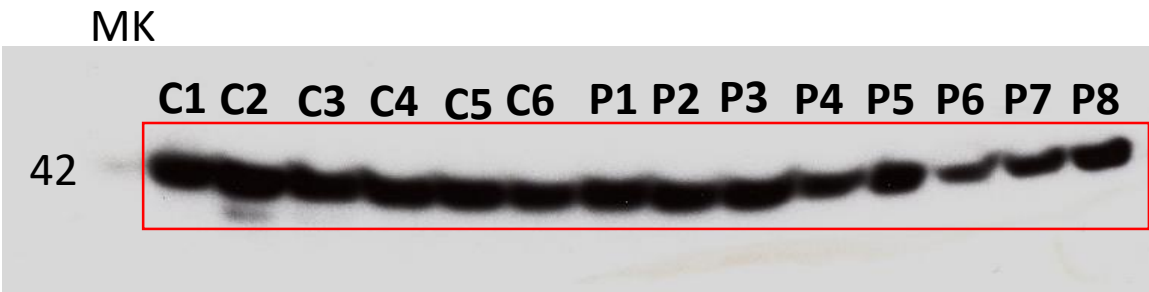

**Figure 2**

**Col type I (139 KDa)**

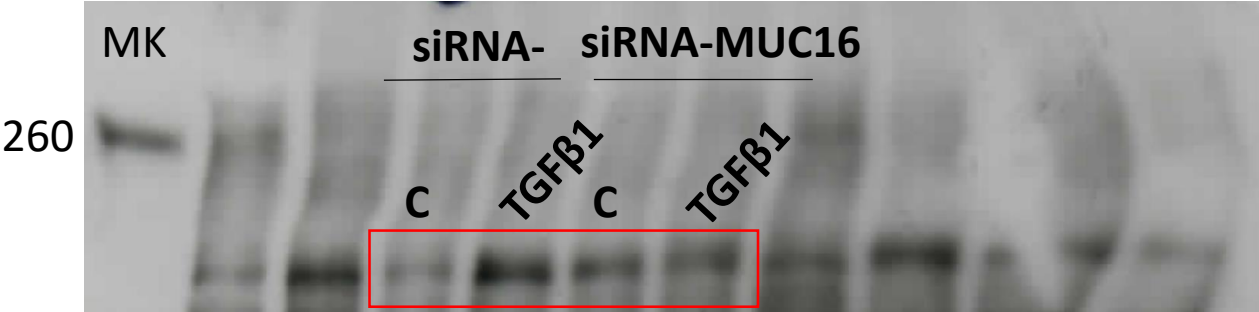

**β-actin (~ 42 KDa)**

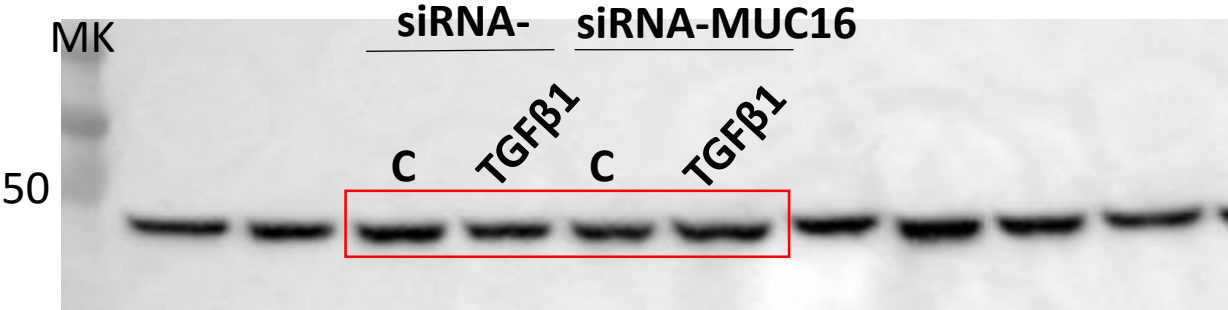

Figure 3

Col type I (139 KDa)

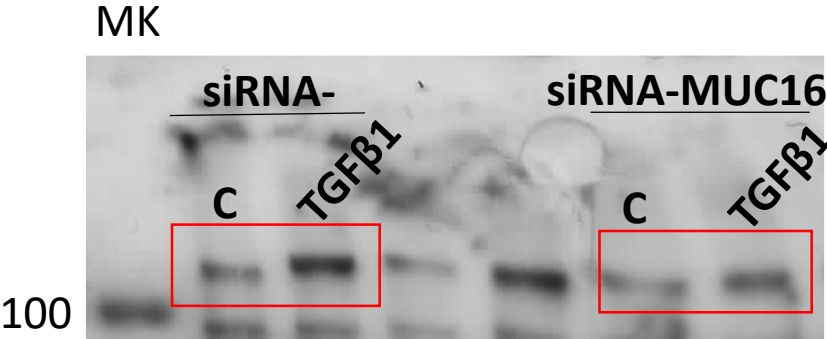

β-actin (~ 42 KDa)

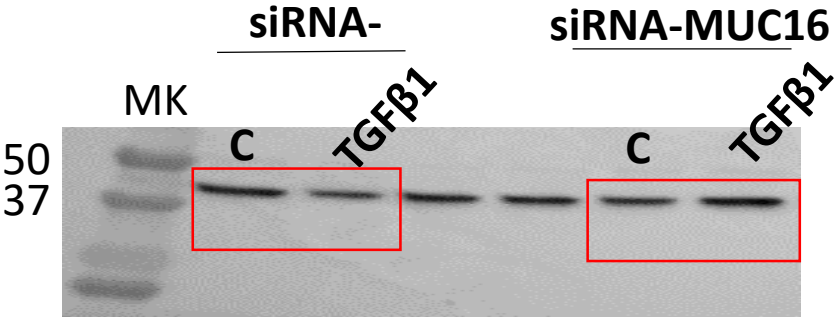

**Figure 5**

**A549**

**P-Smad3 (~50 KDa)**

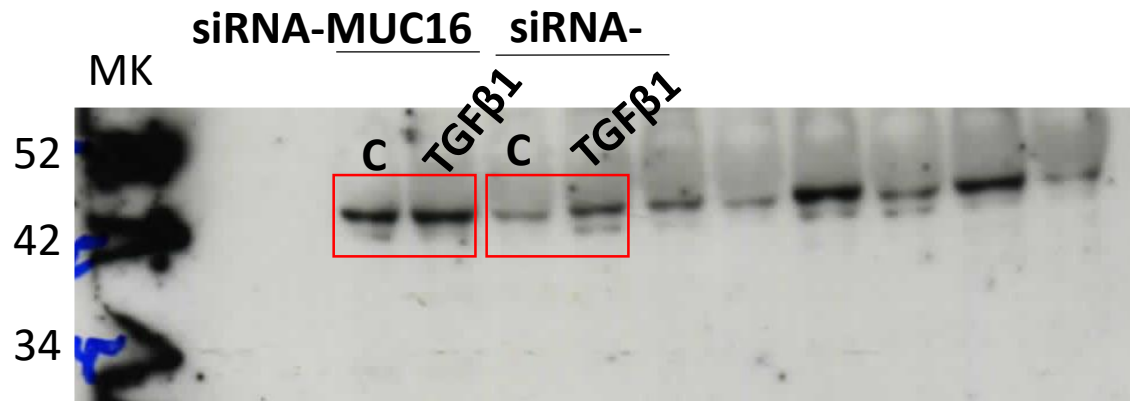

**β-catenin (~ 96 KDa)**

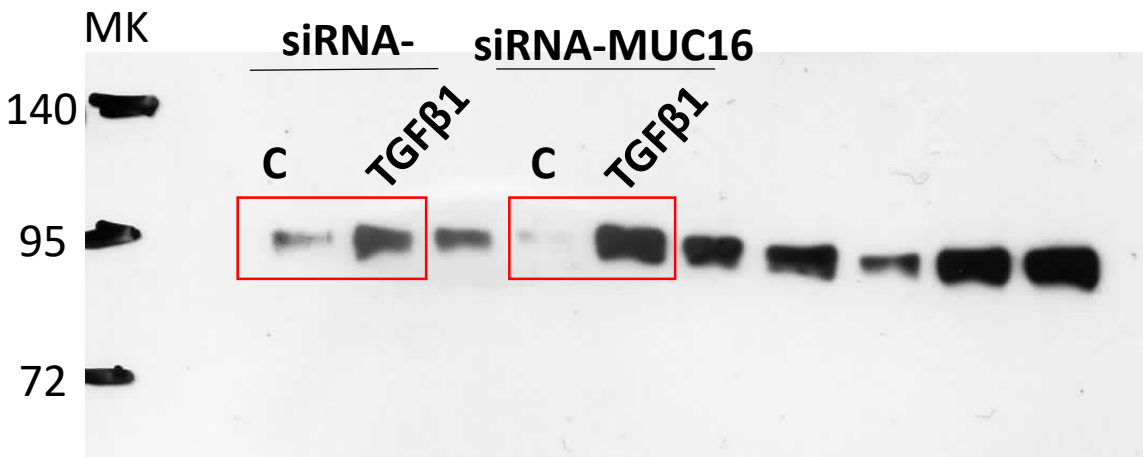

Figure 5

A549

Smad3 (~50 KDa)

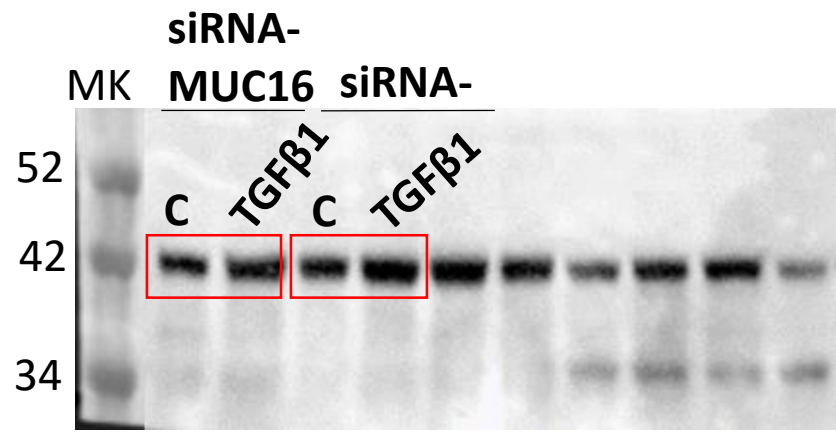

$\beta$ -actin (~ 42 KDa)

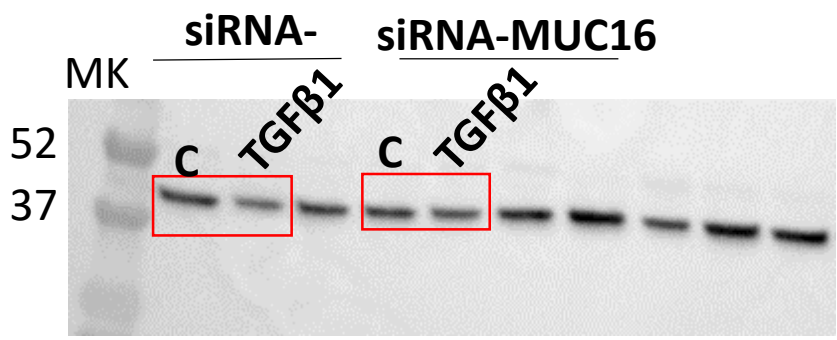

**Figure 5**

**MRC5**

**P-Smad3 (~50 KDa)**

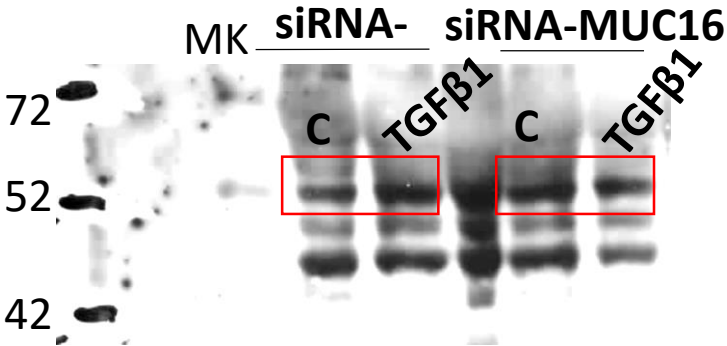

**β-catenin (~ 96 KDa)**

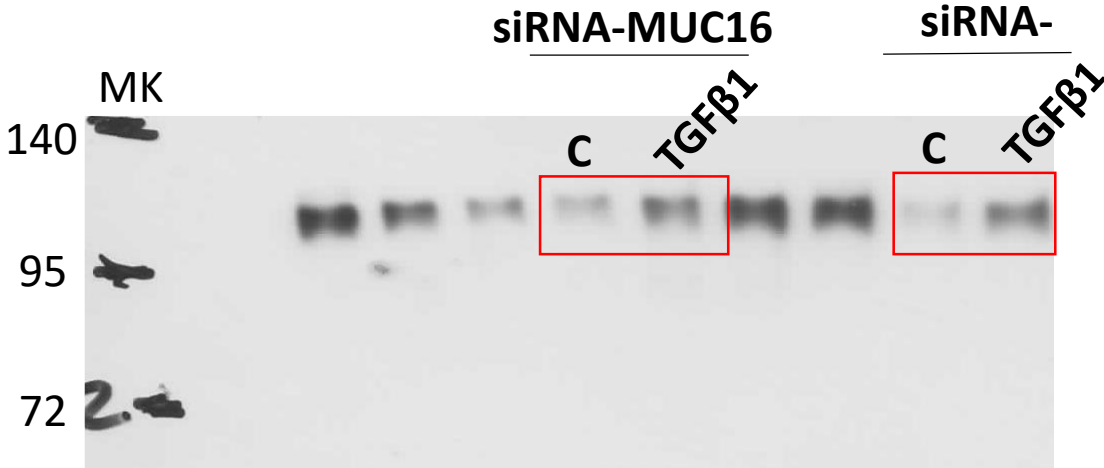

**Figure 5**  
**MRC5**  
**Smad3 (~50 KDa)**

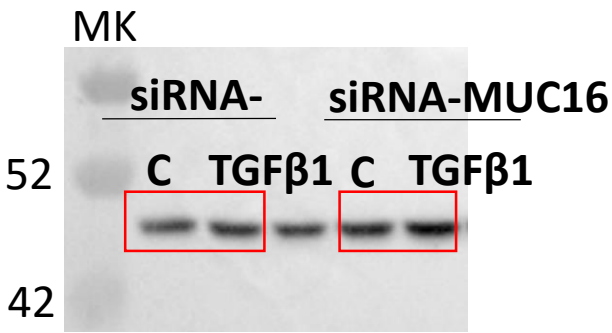

**β-actin (~ 42 KDa)**

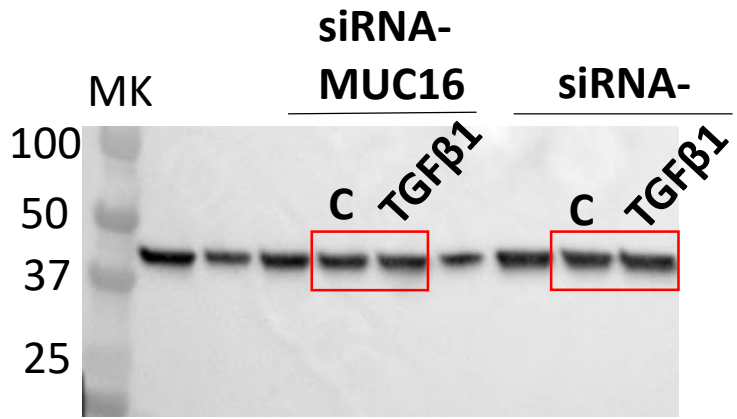

**Figure 5**

**IP MUC16; A549      IP MUC16; MRC5**  
**P-Smad3 (~50 KDa)**

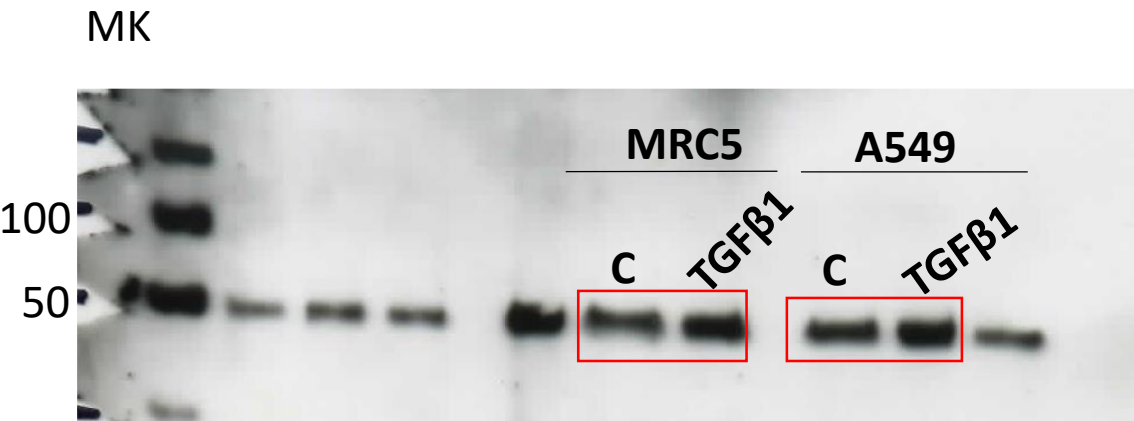

**IP MUC16; A549      IP MUC16; MRC5**  
**MUC16 (~200 KDa)**

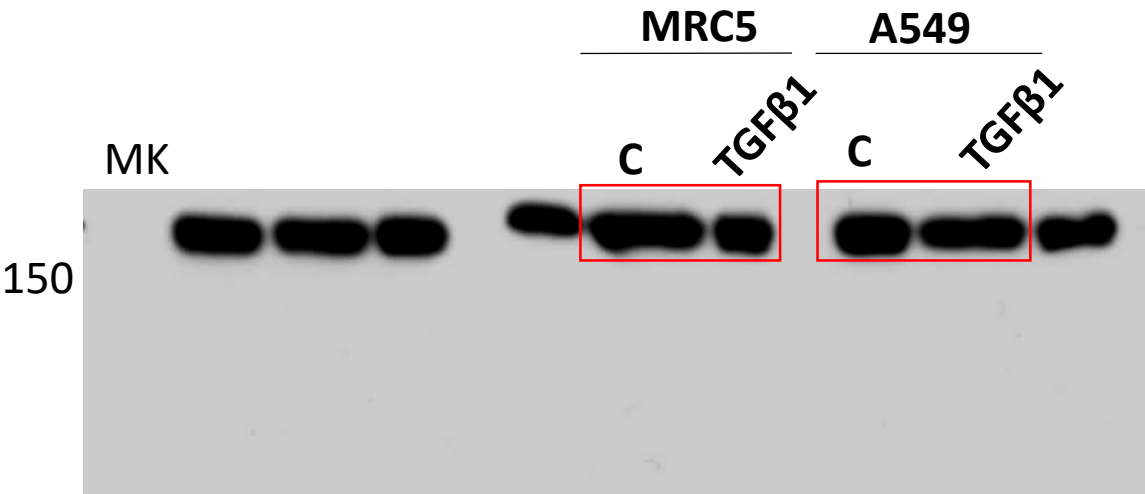

Supplement: s1 [file s1]
