# Supplementary material for: MUC16 Is Overexpressed in Idiopathic Pulmonary Fibrosis and Induces Fibrotic Responses Mediated by Transforming Growth Factor-β1 Canonical Pathway
Source: MDPI journal article supplement (doi:10.3390/ijms22126502), 2021-06-17
Supplement: s1 [file s1]

## **TITLE**

**MUC16 is overexpressed in idiopathic pulmonary fibrosis and induces fibrotic responses mediated by transforming growth factor- $\beta$ 1 canonical pathway**

## **Authors**

Beatriz Ballester <sup>1,2\*</sup> PhD; Javier Milara <sup>2,3,4\*</sup> PharmD, PhD; Paula Montero <sup>4</sup>; Prof. Julio Cortijo <sup>2,4,5</sup> PharmD, PhD.

## **Author Affiliations**

<sup>1</sup> Comprehensive Pneumology Center (CPC), Helmholtz Zentrum München, München, Germany.

<sup>2</sup>CIBERES, Health Institute Carlos III, Valencia, Spain

<sup>3</sup>Pharmacy Unit, General University Hospital, Valencia, Spain

<sup>4</sup>Department of Pharmacology, Faculty of Medicine, University of Valencia, Spain

<sup>5</sup>Research and teaching Unit, University General Hospital Consortium, Valencia, Spain

\*Both authors contributed equally to this work

## **Corresponding author:**

Beatriz Ballester, PhD; Comprehensive Pneumology Center (CPC), Helmholtz Zentrum München. Max-Lebsche-Platz 31, 81377, München, Germany; +34 605148470; E-mail: [beatriz.ballester@helmholtz-muenchen.de](mailto:beatriz.ballester@helmholtz-muenchen.de)

Javier Milara, Pharmacy unit, University General Hospital Consortium of Valencia, Spain. Phone: +34 963864631; E-mail: [xmilara@hotmail.com](mailto:xmilara@hotmail.com)

**Key words:** Idiopathic pulmonary fibrosis; MUC16; transforming growth factor beta

## Supplementary Figures

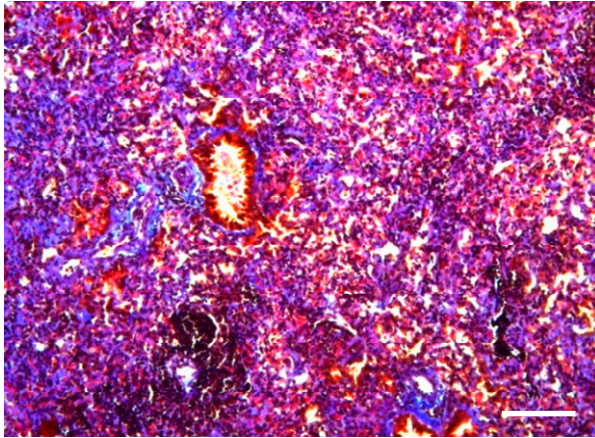

### Supplementary Figure 1

**Supplementary Figure 1. Masson's trichrome representative staining on IPF lung sections (scale bar: 100  $\mu$ m).**
